# Supplementary material for: Mocetinostat activates Krüppel-like factor 4 and protects against tissue destruction and inflammation in osteoarthritis
Source: PubMed Central journal article supplement (PMC10544226; doi:10.1172/jci.insight.170513), 2023-09-08
Supplement: jciinsight-8-170513-s242.pdf [file jciinsight-8-170513-s242.pdf]

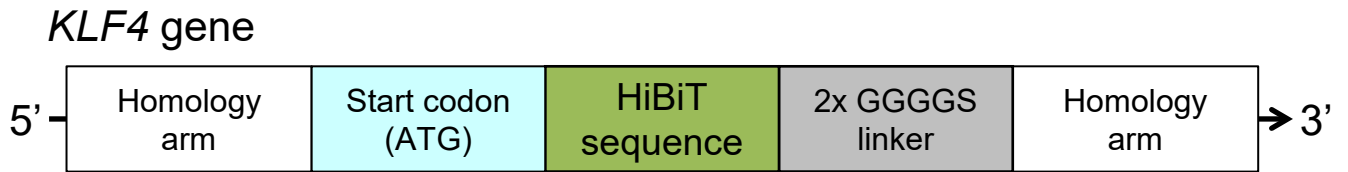

**Supplemental Figure 1. A schema for *KLF4* gene editing in SW1353 cells to establish the *KLF4* reporter cell line.**

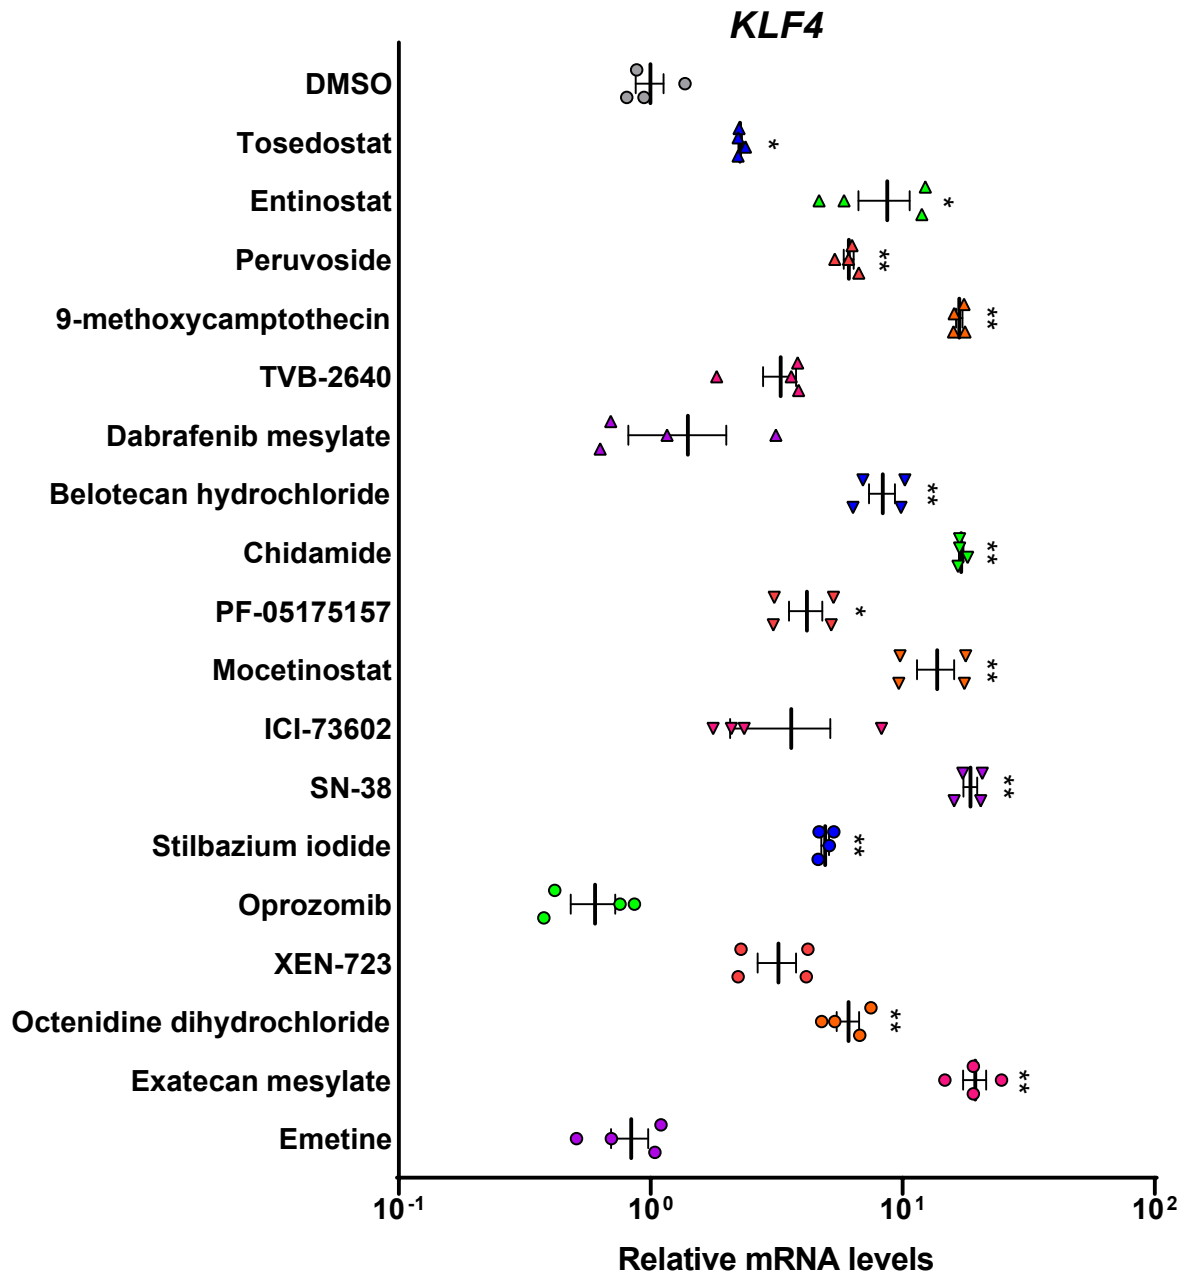

**Supplemental Figure 2. *KLF4* expression levels in SW1353 cells treated with the identified compounds.** Cells were treated with the indicated compounds at the tolerated doses or DMSO, and RNA was collected 24 hours after initiation of treatment. mRNA levels are expressed as means ± SE, relative to DMSO (n=4 from four independent experiments). \*P<0.05, \*\*P<0.01, Dunnett's test versus DMSO. Results of one-way mixed-effects ANOVA test are shown in Supplemental Table 17.

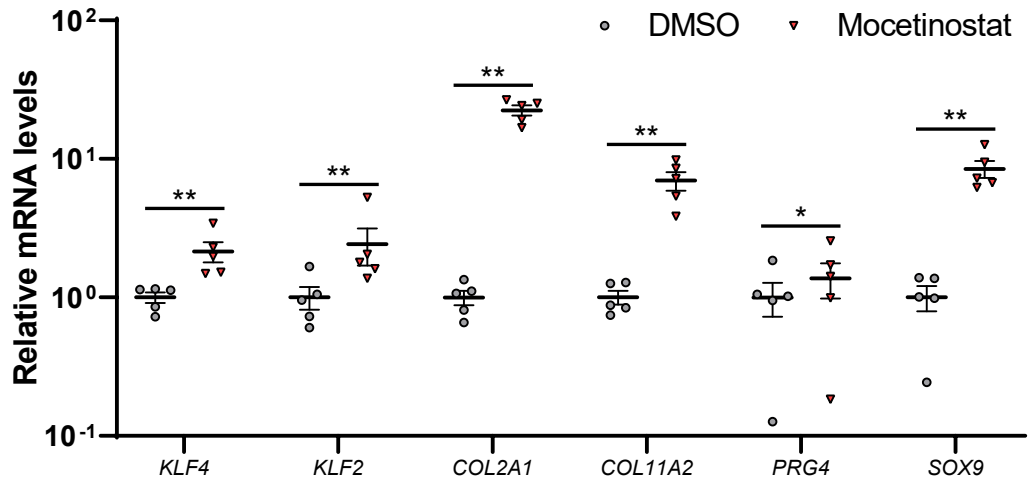

**Supplemental Figure 3. Regulation of chondrogenic genes by mocetinostat in human BMSCs during monolayer culture.** Cells were treated with 10  $\mu$ M of mocetinostat or DMSO, and RNA was collected 24 hours after initiation of treatment. mRNA levels are expressed as means  $\pm$  SE, relative to DMSO (n=5 donors). \*P<0.05, \*\*P<0.01, paired t-test.

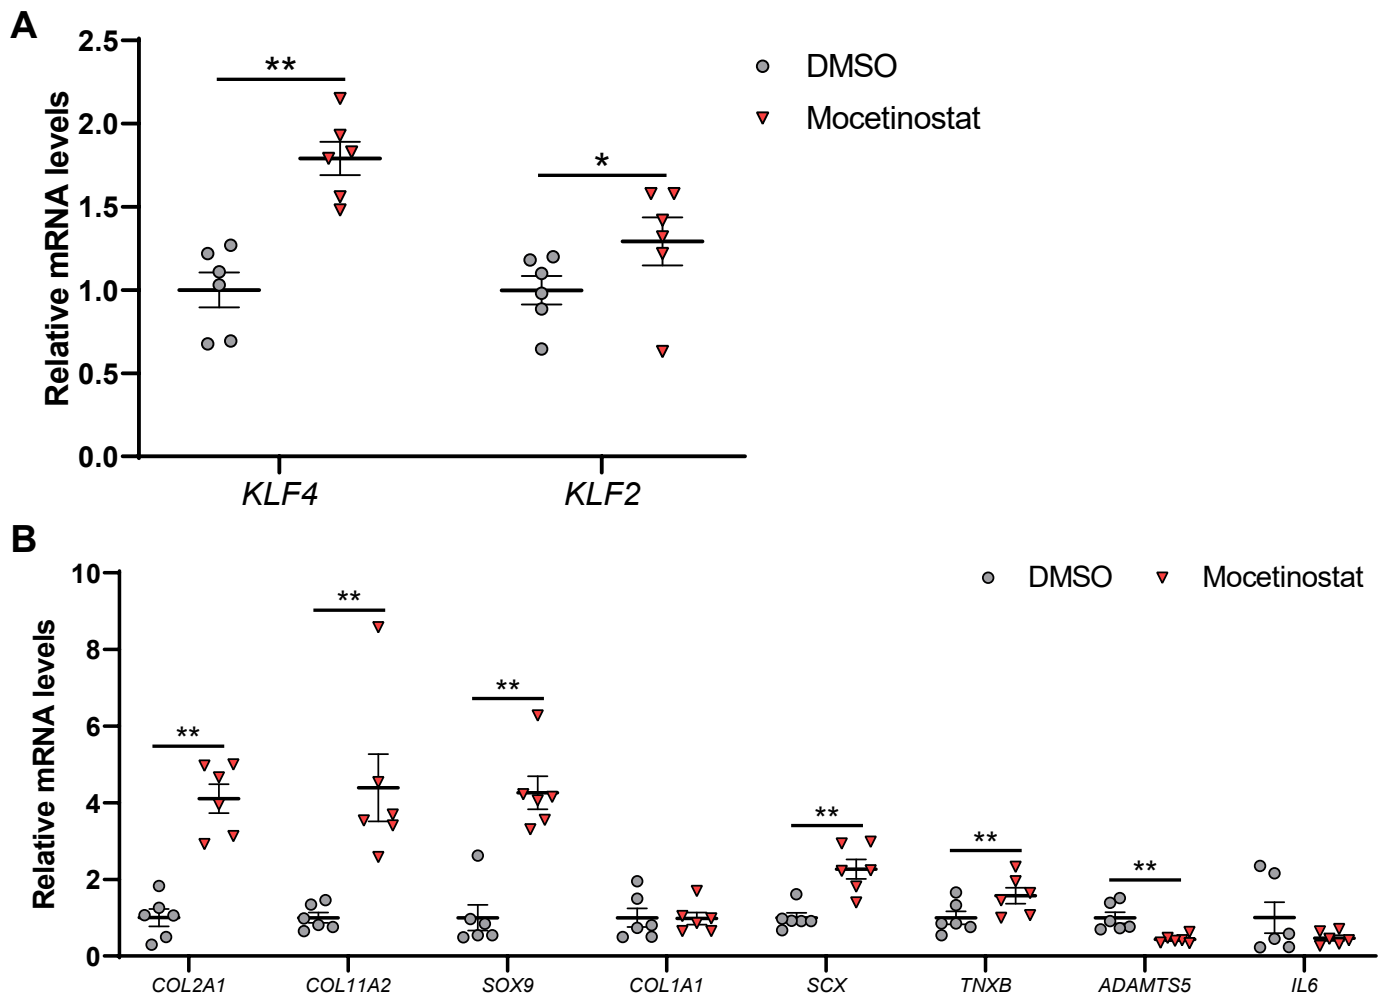

**Supplemental Figure 4. Regulation of anabolic and catabolic genes by mocetinostat in human meniscal cells.** (A, B) Cells were treated with 10  $\mu$ M of mocetinostat or DMSO, and RNA was collected 24 hours after initiation of treatment. mRNA levels are expressed as means  $\pm$  SE, relative to DMSO (n=6 donors). \*P<0.05, \*\*P<0.01, paired t-test.

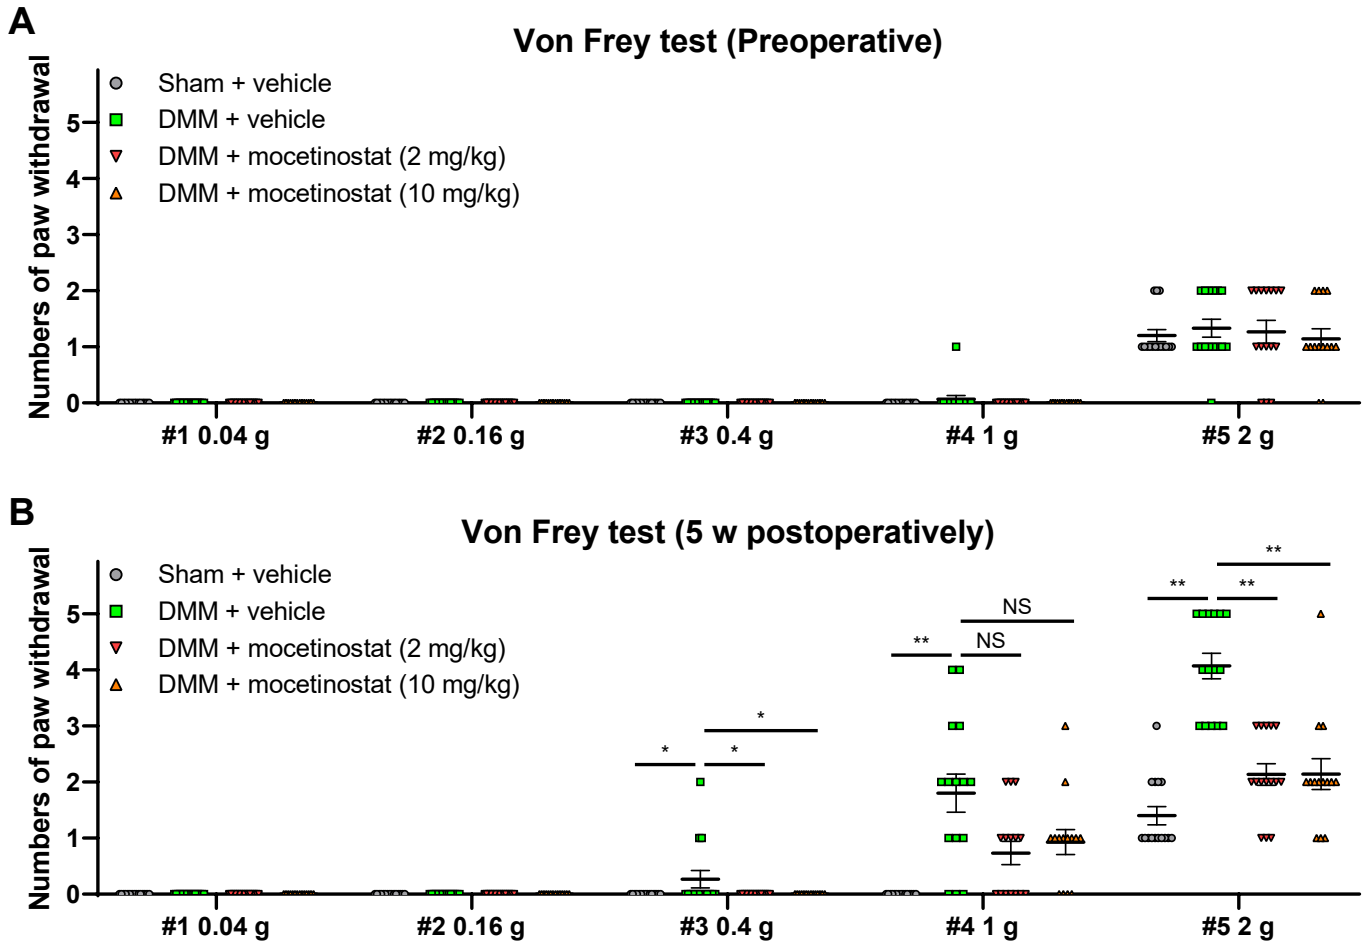

**Supplemental Figure 5. Von Frey test in mocetinostat-treated mice after DMM surgery. (A, B)** Related to the experiments in Figure 5, results of von Frey test preoperatively (A) and at 5 weeks postoperatively (B) in mocetinostat-treated mice after DMM surgery are shown. Numbers of paw withdrawal from 5 stimulations per filament per mouse are expressed as means  $\pm$  SE.  $n=14$  for DMM + 10 mg/kg of mocetinostat, and  $n=15$  for the other groups. \* $P<0.05$ , \*\* $P<0.01$ , Dunn's test versus DMM + vehicle. NS, not significant. Results of Kruskal-Wallis test are shown in Supplemental Table 17.

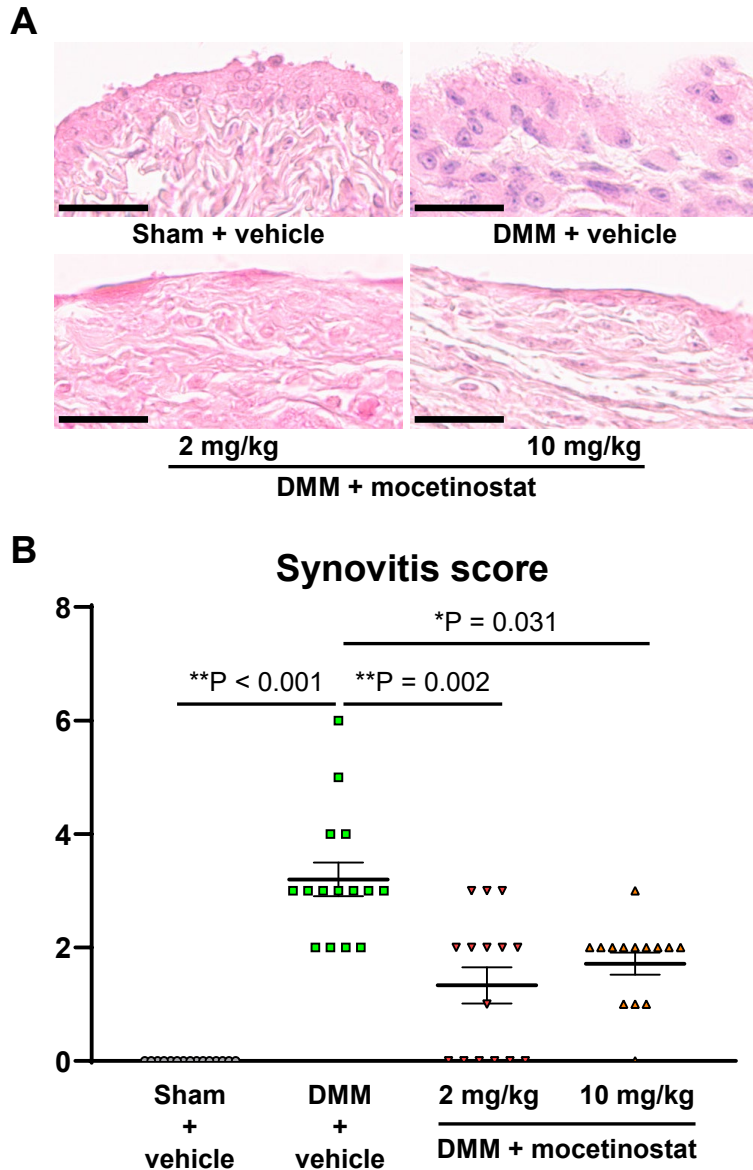

**Supplemental Figure 6. Synovitis scores in mocetinostat-treated mice after DMM surgery.** This figure shows data related to the experiments in Figure 5.  $n=14$  for DMM + 10 mg/kg of mocetinostat, and  $n=15$  for the other groups. (A) Representative HE staining images of synovium for each group. Scale bars, 15  $\mu\text{m}$ . (B) Synovitis scores.  $*P<0.05$ ,  $**P<0.01$ , Dunn's test versus DMM + vehicle. All quantitative data are expressed as means  $\pm$  SE, and results of Kruskal-Wallis test are shown in Supplemental Table 17.

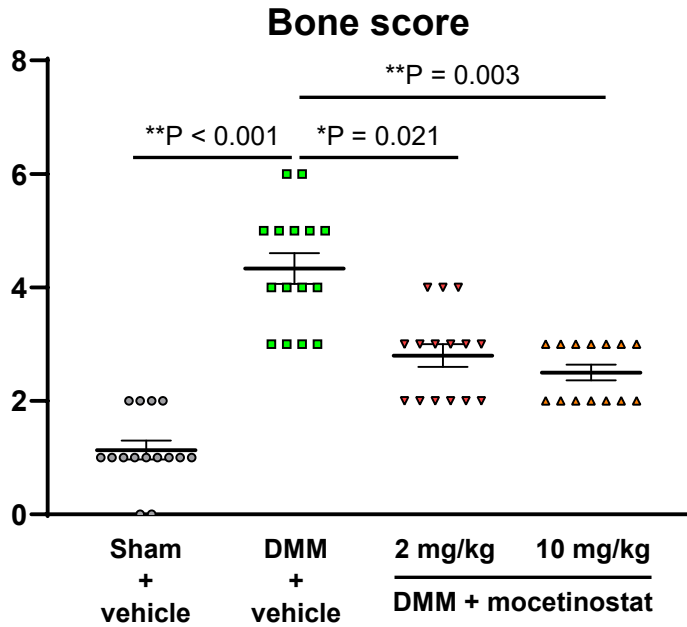

**Supplemental Figure 7. Bone scores in mocetinostat-treated mice after DMM surgery.** This figure shows data related to the experiments in Figure 5.  $n=14$  for DMM + 10 mg/kg of mocetinostat, and  $n=15$  for the other groups. \* $P<0.05$ , \*\* $P<0.01$ , Dunn's test versus DMM + vehicle. All quantitative data are expressed as means  $\pm$  SE, and results of Kruskal-Wallis test are shown in Supplemental Table 17.

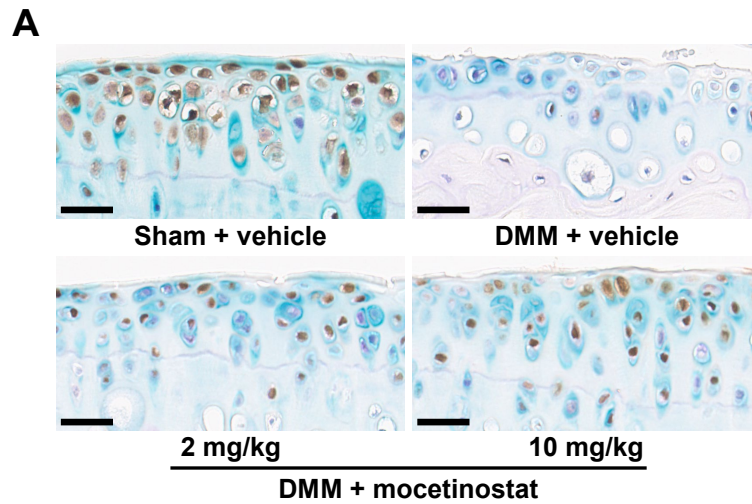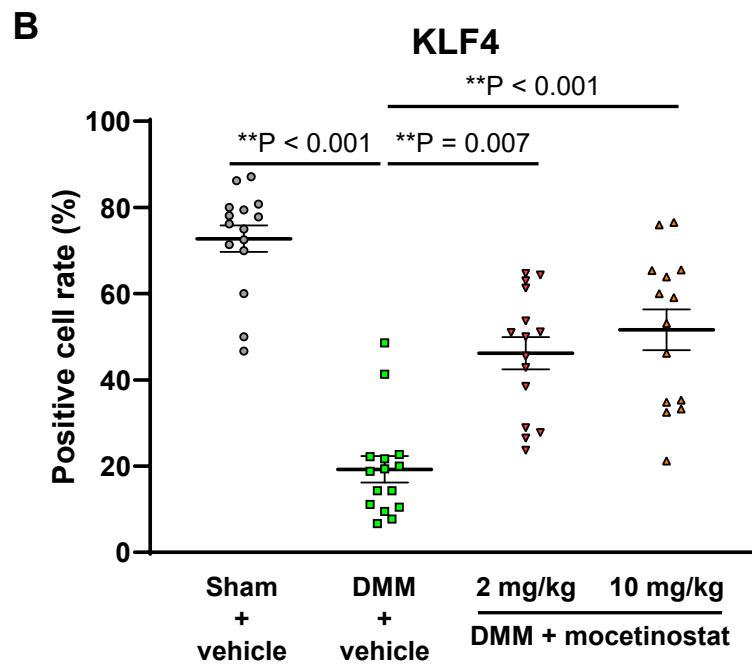

**Supplemental Figure 8. KLF4 expression in mocetinostat-treated mice after DMM surgery.** This figure shows data related to the experiments in Figure 5. (A, B) Immunohistochemistry for KLF4 in knee cartilage was performed.  $n=14$  for DMM + 10 mg/kg of mocetinostat, and  $n=15$  for the other groups. Scale bars, 60  $\mu\text{m}$ . \* $P < 0.05$ , \*\* $P < 0.01$ , Dunn's test versus DMM + vehicle. All quantitative data are expressed as means  $\pm$  SE, and results of Kruskal-Wallis test are shown in Supplemental Table 17.



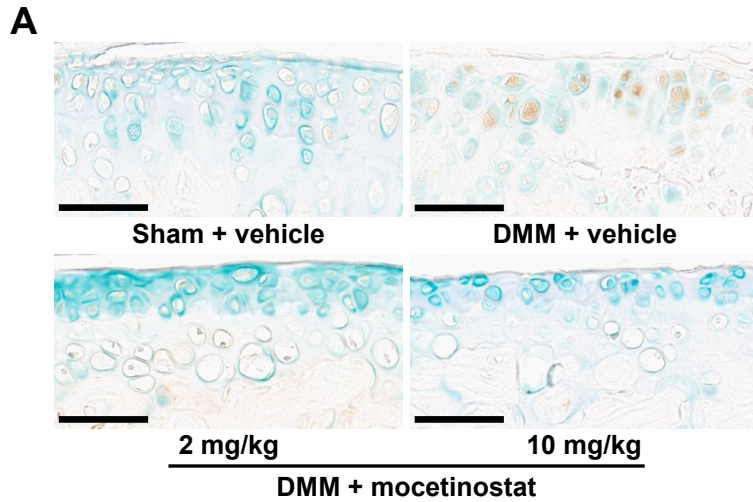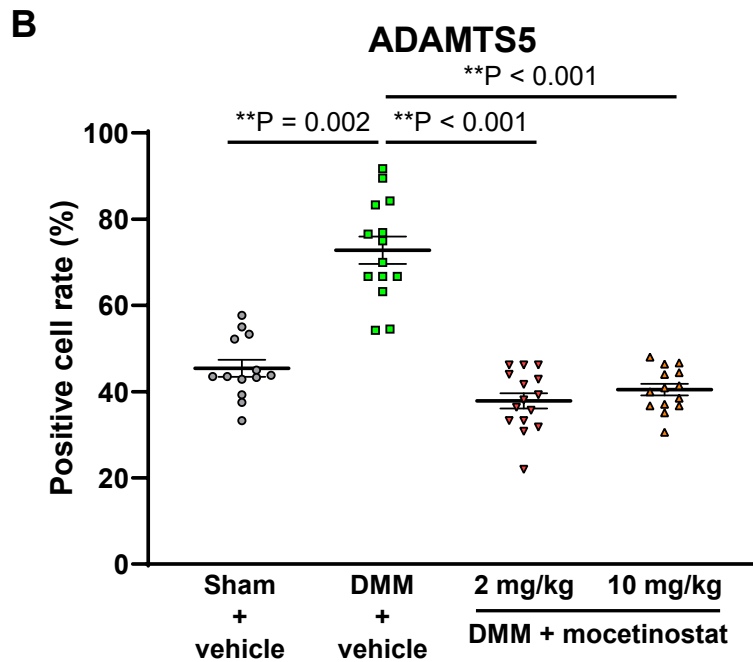

**Supplemental Figure 9. ADAMTS5 expression in mocetinostat-treated mice after DMM surgery.** This figure shows data related to the experiments in Figure 5. (A, B) Immunohistochemistry for ADAMTS5 in knee cartilage was performed.  $n=13$  for Sham + vehicle,  $n=14$  for DMM + vehicle,  $n=15$  for DMM + 2 mg/kg of mocetinostat, and  $n=14$  for DMM + 10 mg/kg of mocetinostat. Scale bars, 60  $\mu\text{m}$ . \* $P < 0.05$ , \*\* $P < 0.01$ , Dunn's test versus DMM + vehicle. All quantitative data are expressed as means  $\pm$  SE, and results of Kruskal-Wallis test are shown in Supplemental Table 17.

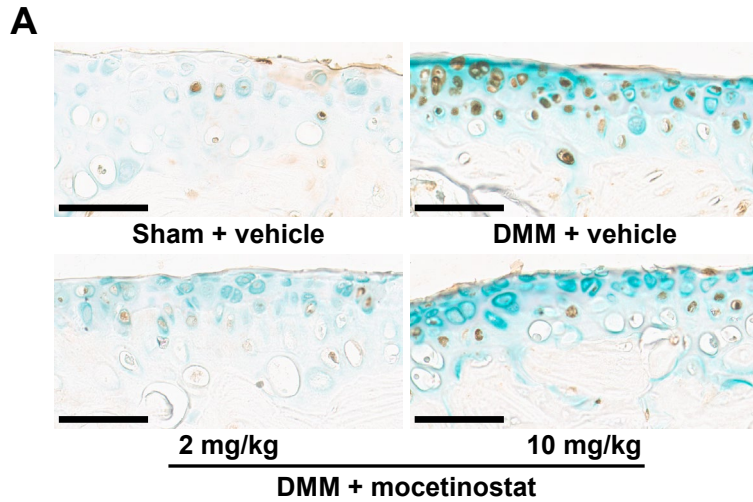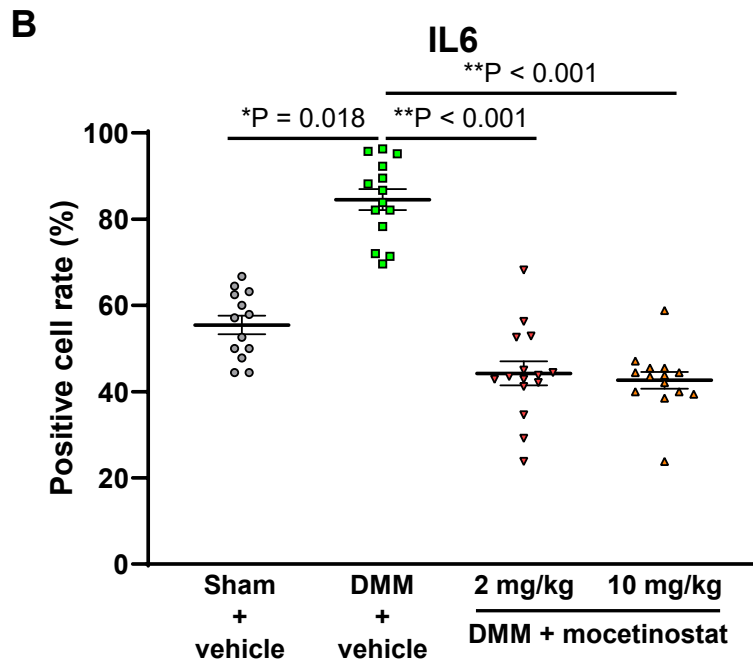

**Supplemental Figure 10. IL6 expression in mocetinostat-treated mice after DMM surgery.** This figure shows data related to the experiments in Figure 5. (A, B) Immunohistochemistry for IL6 in knee cartilage was performed. n=13 for Sham + vehicle, n=14 for DMM + vehicle, n=15 for DMM + 2 mg/kg of mocetinostat, and n=14 for DMM + 10 mg/kg of mocetinostat. Scale bars, 60  $\mu$ m. \*P<0.05, \*\*P<0.01, Dunn's test versus DMM + vehicle. All quantitative data are expressed as means  $\pm$  SE, and results of Kruskal-Wallis test are shown in Supplemental Table 17.

**A**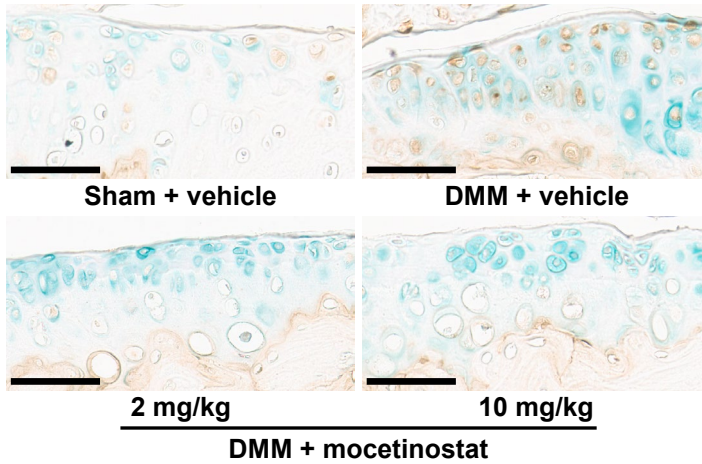**B**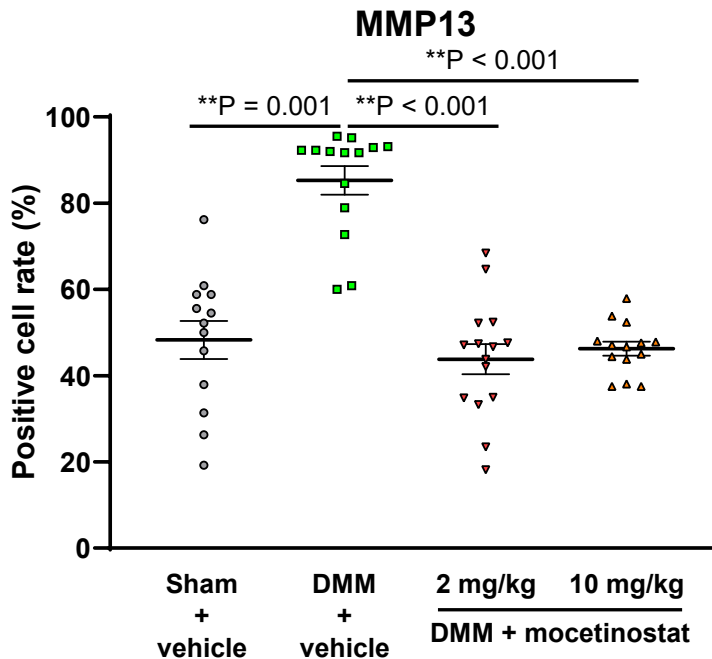

**Supplemental Figure 11. MMP13 expression in mocetinostat-treated mice after DMM surgery.** This figure shows data related to the experiments in Figure 5. (A, B) Immunohistochemistry for MMP13 in knee cartilage was performed. n=13 for Sham + vehicle, n=14 for DMM + vehicle, n=15 for DMM + 2 mg/kg of mocetinostat, and n=14 for DMM + 10 mg/kg of mocetinostat. Scale bars, 60  $\mu$ m. \*P<0.05, \*\*P<0.01, Dunn's test versus DMM + vehicle. All quantitative data are expressed as means  $\pm$  SE, and results of Kruskal-Wallis test are shown in Supplemental Table 17.

**A**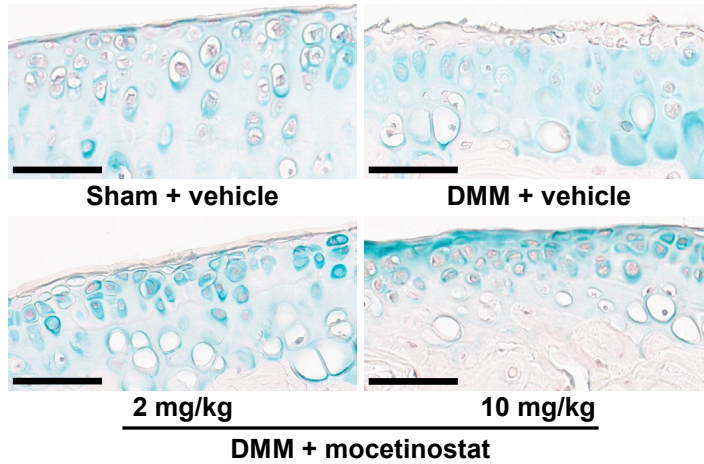**B**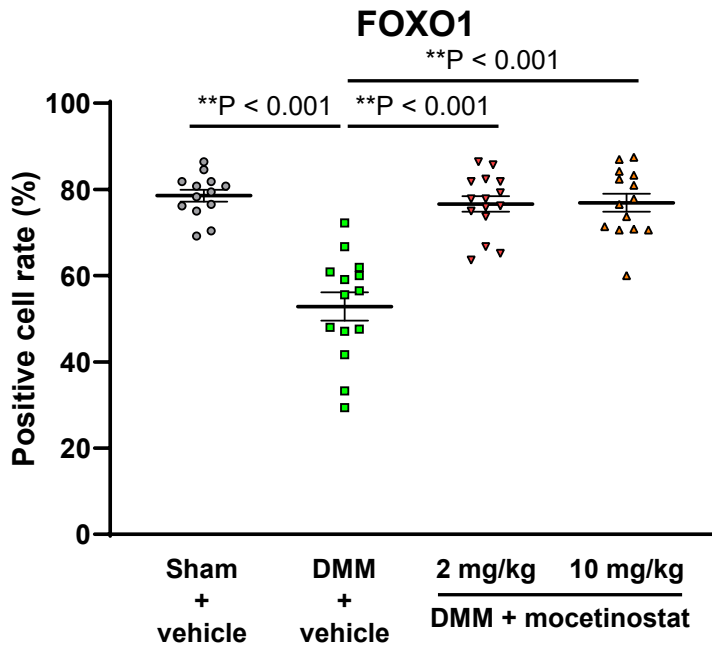

**Supplemental Figure 12. FOXO1 expression in mocetinostat-treated mice after DMM surgery.** This figure shows data related to the experiments in Figure 5. (A, B) Immunohistochemistry for FOXO1 in knee cartilage was performed. n=13 for Sham + vehicle, n=14 for DMM + vehicle, n=15 for DMM + 2 mg/kg of mocetinostat, and n=14 for DMM + 10 mg/kg of mocetinostat. Scale bars, 60  $\mu$ m. \*P<0.05, \*\*P<0.01, Dunn's test versus DMM + vehicle. All quantitative data are expressed as means  $\pm$  SE, and results of Kruskal-Wallis test are shown in Supplemental Table 17.

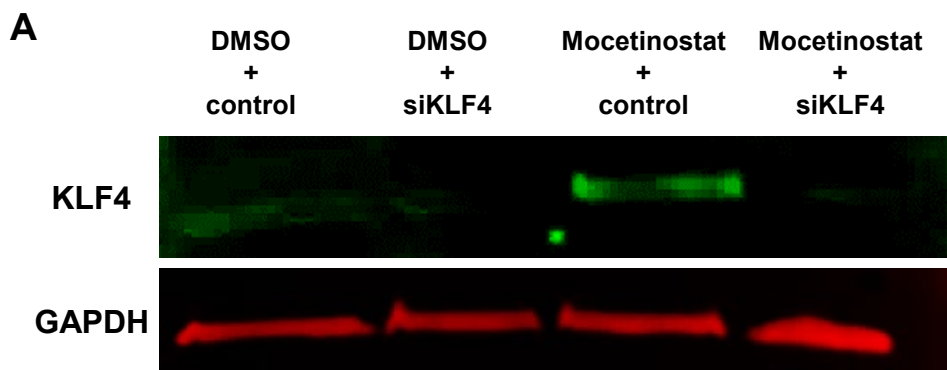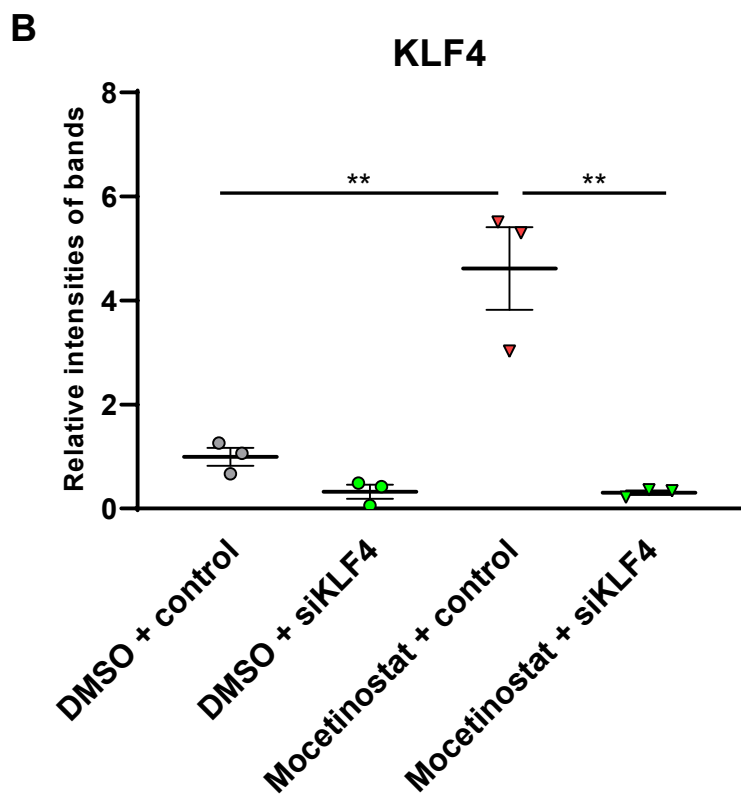

**Supplemental Figure 13. Western blotting analysis of mocetinostat-treated TC28 cells.** Cells were transfected with siRNAs, and were treated with 2  $\mu$ M mocetinostat or DMSO. Total protein was collected 24 hours after initiation of treatment. (A) Representative blots from three independent experiments. (B) Normalized intensities of protein bands are expressed as means  $\pm$  SE, relative to DMSO + control (n=3 independent experiments). \*P<0.05, \*\*P<0.01, Sidak's multiple comparison test. Results of two-way mixed-effects ANOVA test are shown in Supplemental Table 17.

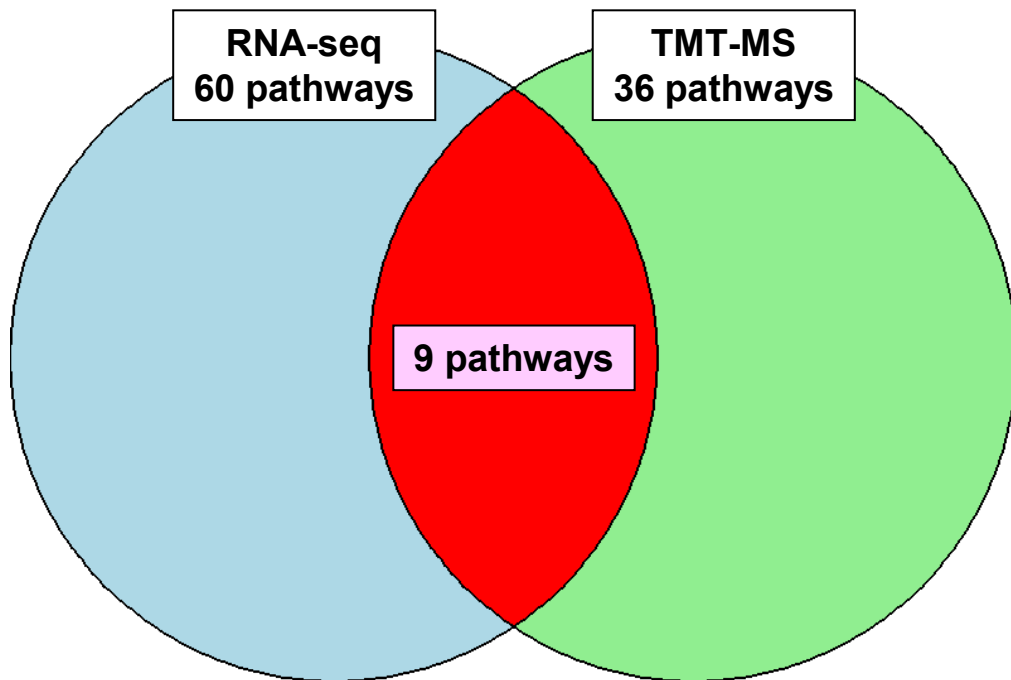

**Supplemental Figure 14. Venn diagram of enriched pathways in KEGG pathway analysis for the URGs of the RNA-seq data and the URPs of the TMT-MS data.**

## *PPARGC1A*

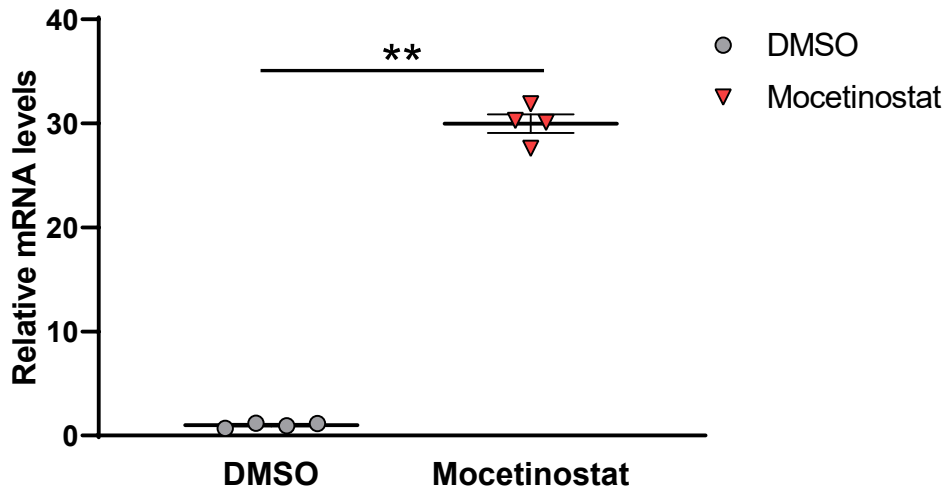

**Supplemental Figure 15. Regulation of *PPARGC1A* by mocetinostat in TC28a2 cells.** Cells were treated with 2  $\mu$ M of mocetinostat or DMSO, and RNA was collected 24 hours after initiation of treatment. mRNA levels are expressed as means  $\pm$  SE, relative to DMSO (n=4 independent experiments). \*P<0.05, \*\*P<0.01, paired t-test.

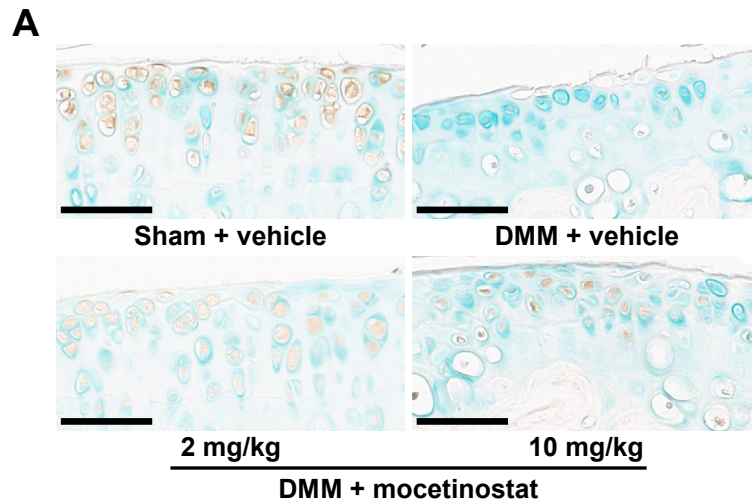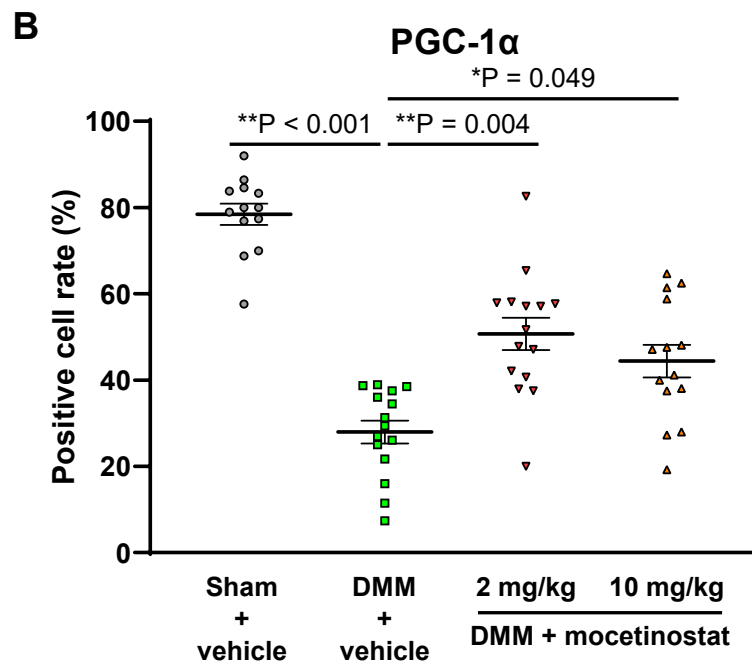

**Supplemental Figure 16. PGC-1 $\alpha$  expression in mocetinostat-treated mice after DMM surgery.** This figure shows data related to the experiments in Figure 5. (A, B) Immunohistochemistry for PGC-1 $\alpha$  in knee cartilage was performed. n=13 for Sham + vehicle, n=15 for DMM + vehicle and DMM + 2 mg/kg of mocetinostat, and n=14 for DMM + 10 mg/kg of mocetinostat. Scale bars, 60  $\mu$ m. \*P<0.05, \*\*P<0.01, Dunn's test versus DMM + vehicle. All quantitative data are expressed as means  $\pm$  SE, and results of Kruskal-Wallis test are shown in Supplemental Table 17.



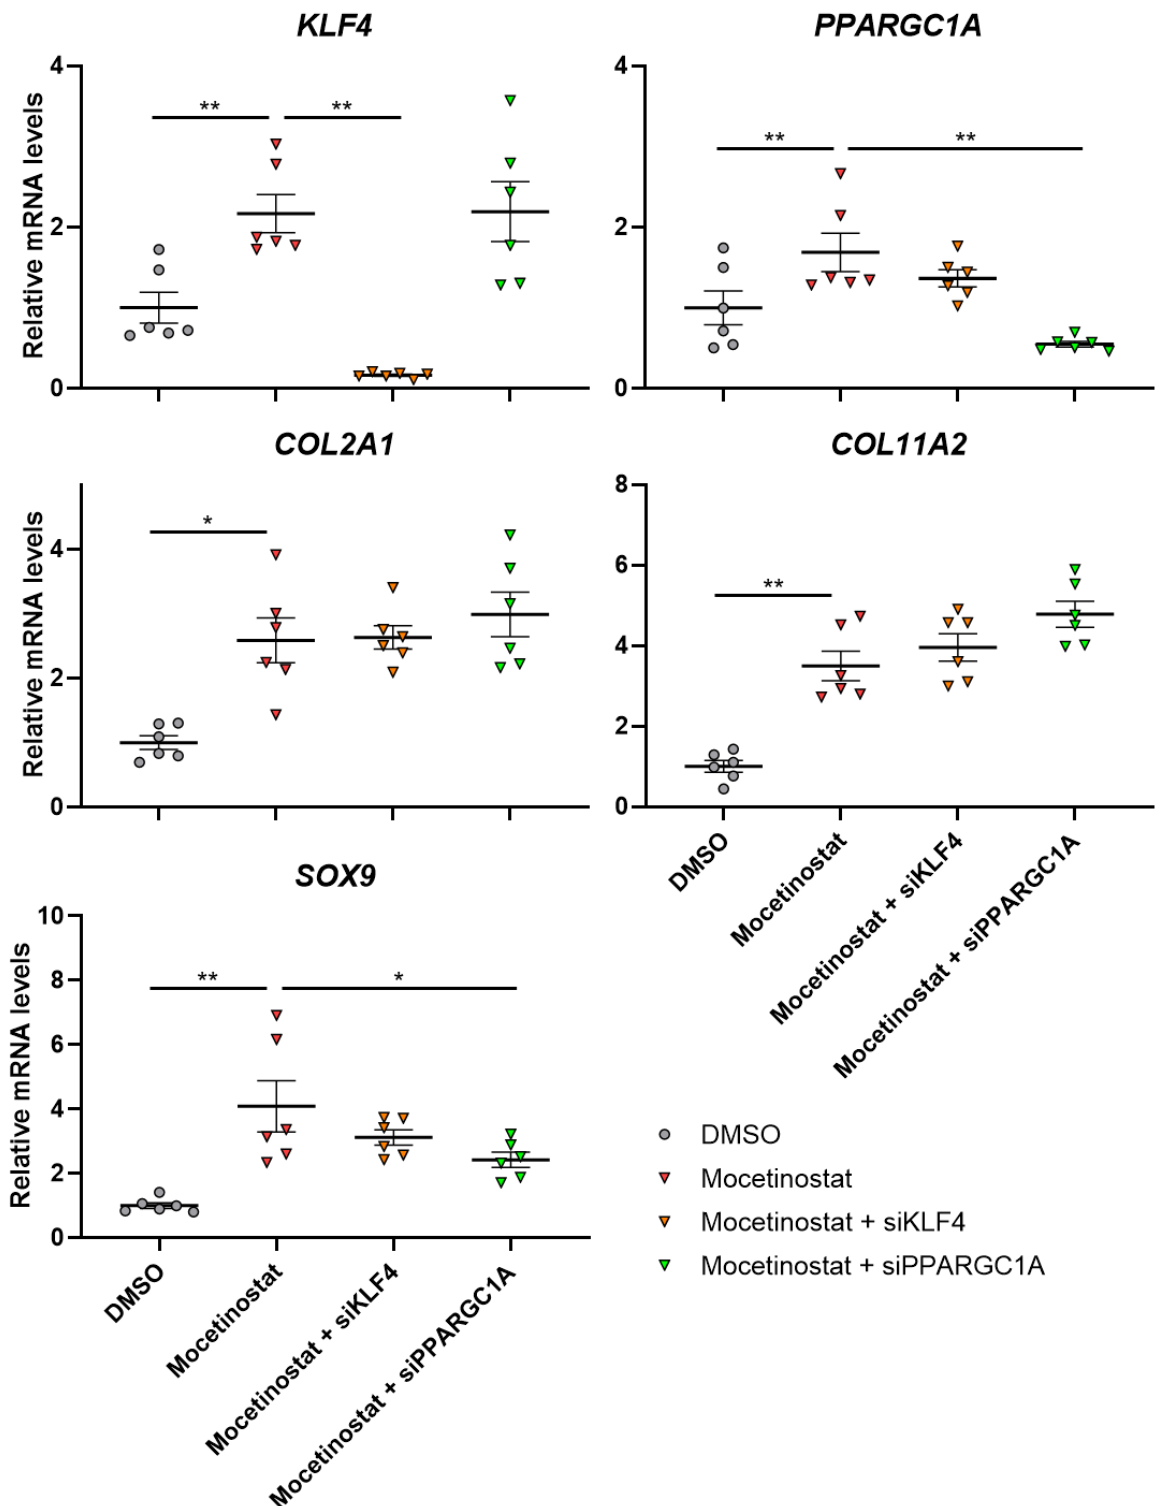

**Supplemental Figure 17. siRNA knockdown of *KLF4* and *PPARGC1A* in mocetinostat-treated OA chondrocytes.** Cells were transfected with siRNAs, and were treated with 30  $\mu$ M mocetinostat or DMSO (n=6 donors). RNA was collected 24 hours after initiation of mocetinostat treatment. mRNA levels are expressed as means  $\pm$  SE, relative to DMSO. \*P<0.05, \*\*P<0.01, Dunnett's test versus mocetinostat. Results of one-way mixed-effects ANOVA test are shown in Supplemental Table 17.

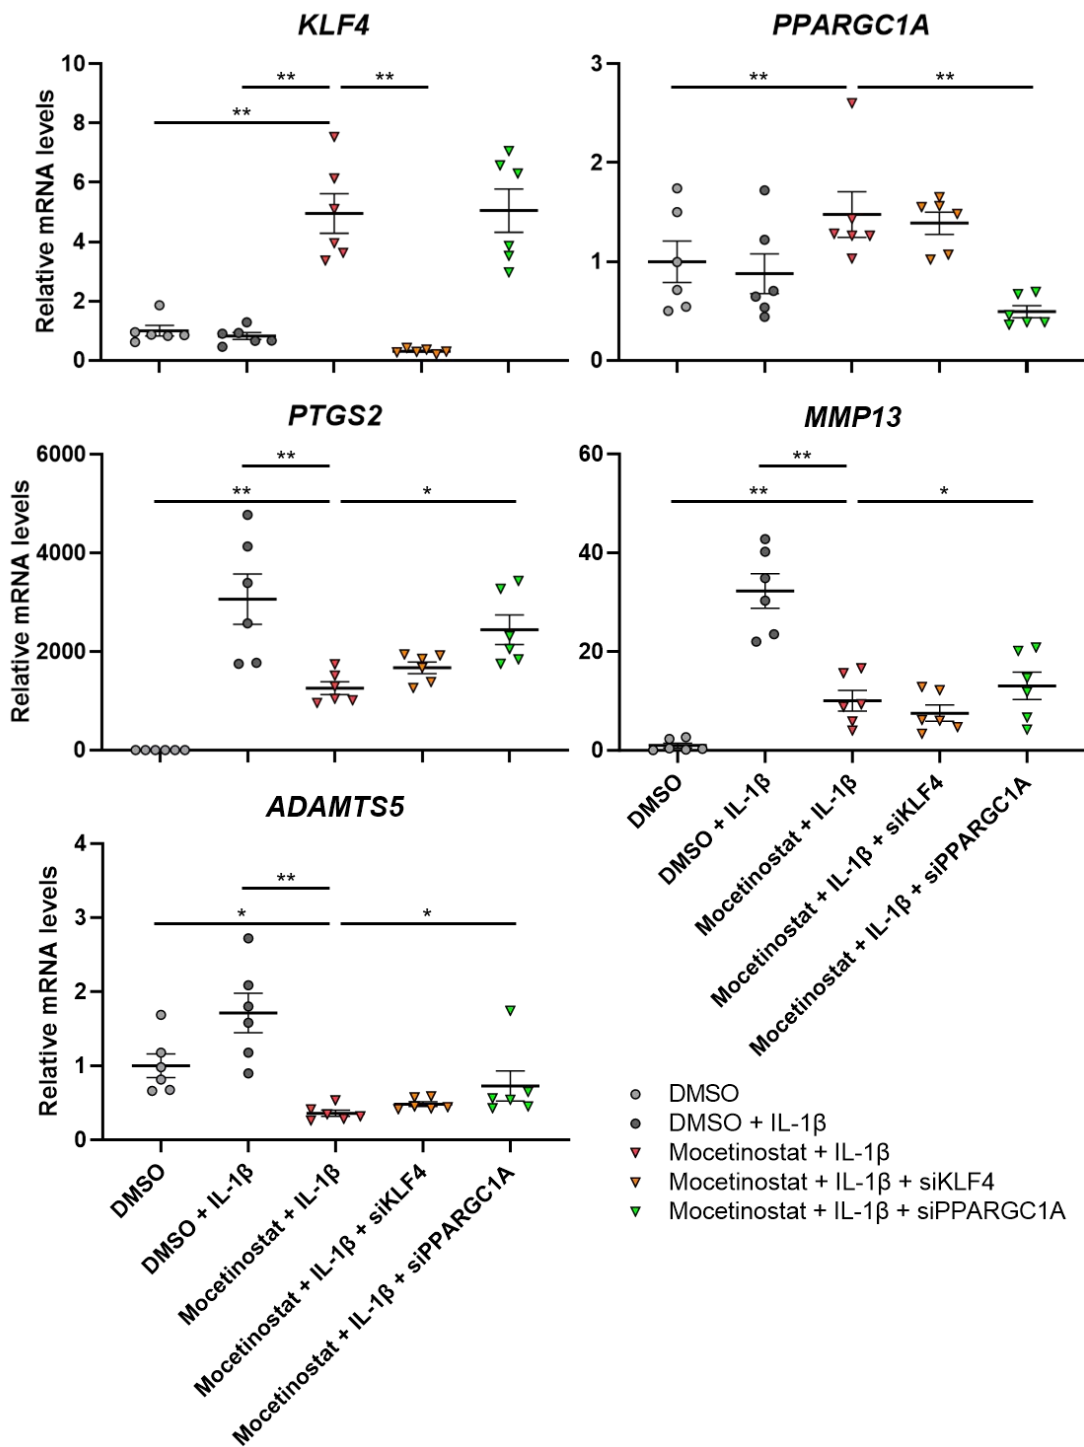

**Supplemental Figure 18. siRNA knockdown of *KLF4* and *PPARGC1A* in mocetinostat-treated OA chondrocytes on IL-1 $\beta$  stimulation.** Cells were transfected with small interfering RNAs (siRNAs), and were treated with 30  $\mu$ M mocetinostat or DMSO (n=6 donors). RNA was collected 24 hours after initiation of mocetinostat treatment and 6 hours after stimulation with 10 ng/ml of IL-1 $\beta$ . mRNA levels are expressed as means  $\pm$  SE, relative to DMSO. \*P<0.05, \*\*P<0.01, Dunnett's test versus mocetinostat + IL-1 $\beta$ . Results of one-way mixed-effects ANOVA test are shown in Supplemental Table 17.

**Supplemental Table 1. List of the hit compounds in the HTS.**

| Compound                   | EC <sub>50</sub> (M) |
|----------------------------|----------------------|
| Birinapant                 | 1.29E-08             |
| Bardoxolone methyl         | 1.95E-08             |
| Dabrafenib mesylate        | 2.04E-08             |
| Chidamide                  | 2.50E-08             |
| Cositecan                  | 3.38E-08             |
| AR-42                      | 3.80E-08             |
| Bortezomib                 | 3.94E-08             |
| Anisomycin                 | 5.66E-08             |
| Mocetinostat               | 5.76E-08             |
| Pharmaprojects No. 6518    | 6.70E-08             |
| PCA-4248                   | 7.15E-08             |
| Centbucridine              | 1.31E-07             |
| CC-115                     | 1.61E-07             |
| PCI-24781                  | 1.62E-07             |
| Oprozomib                  | 1.82E-07             |
| XEN-723                    | 1.86E-07             |
| TVB-2640                   | 2.19E-07             |
| Antimycin A3               | 2.47E-07             |
| 9-methoxycamptothecin      | 3.59E-07             |
| Actinomycin D              | 3.69E-07             |
| Diclazuril                 | 3.81E-07             |
| FR-194738                  | 4.40E-07             |
| Pelitinib                  | 4.46E-07             |
| Belotecan hydrochloride    | 4.47E-07             |
| Octenidine dihydrochloride | 4.50E-07             |
| Stilbazium iodide          | 4.85E-07             |
| Pyrvinium pamoate          | 4.99E-07             |
| Entinostat                 | 5.49E-07             |
| Carfilzomib                | 5.61E-07             |
| Tosedostat                 | 6.04E-07             |
| SN-22                      | 6.23E-07             |
| Emetine                    | 6.35E-07             |
| Edotecarin                 | 6.36E-07             |
| Ixazomib citrate           | 6.52E-07             |
| PRLX-93936                 | 6.53E-07             |
| IMD-0354                   | 7.07E-07             |
| Exatecan mesylate          | 7.23E-07             |
| SN-38                      | 7.33E-07             |
| Adefovir dipivoxil         | 7.37E-07             |
| APPCL                      | 7.40E-07             |
| 56-472                     | 7.55E-07             |
| PF-05175157                | 7.99E-07             |
| MK-8245                    | 8.00E-07             |
| Peruvoside                 | 8.05E-07             |
| ICI-73602                  | 8.12E-07             |
| PNU-166148                 | 8.31E-07             |
| RG-2833                    | 8.43E-07             |
| Delimotecan                | 8.61E-07             |
| Narasin                    | 8.70E-07             |
| BW-114                     | 9.04E-07             |
| MKT-077                    | 9.63E-07             |

**Supplemental Table 2. List of the compounds confirmed in the secondary screen.**

| Compound                   | Classification                                  | EC50 (M) |
|----------------------------|-------------------------------------------------|----------|
| Tosedostat                 | Aminopeptidase inhibitor                        | 1.66E-08 |
| Entinostat                 | Class I Histone deacetylase inhibitor           | 1.78E-08 |
| Peruvoside                 | Cardenolide glycoside                           | 2.39E-08 |
| 9-methoxycamptothecin      | Topoisomerase inhibitor                         | 8.87E-07 |
| TVB-2640                   | Fatty acid synthase inhibitor                   | 3.83E-08 |
| Dabrafenib mesylate        | Raf kinase inhibitor                            | 2.51E-07 |
| Belotecan hydrochloride    | Topoisomerase inhibitor                         | 6.09E-07 |
| Chidamide                  | Class I Histone deacetylase inhibitor           | 3.35E-07 |
| PF-05175157                | Acetyl-CoA carboxylase inhibitor                | 3.48E-07 |
| Mocetinostat               | Class I Histone deacetylase inhibitor           | 4.42E-07 |
| ICI-73602                  | Antirhinovirus compound                         | 4.68E-07 |
| SN-38                      | Topoisomerase inhibitor                         | 5.76E-07 |
| Stilbazium iodide          | Anthelmintic                                    | 5.16E-07 |
| Oprozomib                  | Proteasome inhibitor                            | 6.26E-07 |
| XEN-723                    | Stearoyl-CoA desaturase inhibitor               | 6.36E-07 |
| Octenidine dihydrochloride | Cationic surfactant with antimicrobial activity | 8.38E-07 |
| Exatecan mesylate          | Topoisomerase inhibitor                         | 8.50E-07 |
| Emetine                    | Antiprotozoal                                   | 9.11E-07 |

**Supplemental Table 3. Cell survival rates of SW1353 cells treated with the 18 identified compounds.** Cells were treated with either of the identified compounds or DMSO for 24 hours. Each compound was used with different doses (20 nM, 50 nM, 100 nM, 200 nM, 500 nM, 1  $\mu$ M, 2  $\mu$ M, 5  $\mu$ M, 10  $\mu$ M, 20  $\mu$ M and 30  $\mu$ M), and cell survival rates of each compound were measured at the highest doses with normal cell viability (microscopically observed). Cell survival rates are expressed as means $\pm$ SE (n=4 from four independent experiments). Dunn's test, versus DMSO. Results of Kruskal-Wallis test are shown in Supplemental Table 17.

| Treatment                  | Concentration | Cell survival rates (%) | P values |
|----------------------------|---------------|-------------------------|----------|
| DMSO                       | -             | 94.0 $\pm$ 0.5          | -        |
| Tosedostat                 | 30 $\mu$ M    | 90.9 $\pm$ 0.4          | 0.341    |
| Entinostat                 | 2 $\mu$ M     | 91.1 $\pm$ 0.4          | 0.561    |
| Peruvoside                 | 50 nM         | 90.5 $\pm$ 0.8          | 0.209    |
| 9-methoxycamptothecin      | 10 $\mu$ M    | 92.3 $\pm$ 0.7          | > 0.999  |
| TVB-2640                   | 30 $\mu$ M    | 90.7 $\pm$ 0.5          | 0.170    |
| Dabrafenib mesylate        | 30 $\mu$ M    | 92.1 $\pm$ 0.6          | > 0.999  |
| Belotecan hydrochloride    | 2 $\mu$ M     | 93.3 $\pm$ 1.4          | > 0.999  |
| Chidamide                  | 5 $\mu$ M     | 94.2 $\pm$ 0.9          | > 0.999  |
| PF-05175157                | 30 $\mu$ M    | 93.2 $\pm$ 0.9          | > 0.999  |
| Mocetinostat               | 2 $\mu$ M     | 93.3 $\pm$ 1.2          | > 0.999  |
| ICI-73602                  | 500 nM        | 92.5 $\pm$ 0.9          | > 0.999  |
| SN-38                      | 10 $\mu$ M    | 90.9 $\pm$ 1.1          | 0.477    |
| Stilbazium iodide          | 2 $\mu$ M     | 90.4 $\pm$ 0.7          | 0.119    |
| Oprozomib                  | 50 nM         | 90.9 $\pm$ 1.1          | 0.497    |
| XEN-723                    | 30 $\mu$ M    | 92.0 $\pm$ 0.6          | > 0.999  |
| Octenidine dihydrochloride | 2 $\mu$ M     | 92.2 $\pm$ 1.1          | > 0.999  |
| Exatecan mesylate          | 2 $\mu$ M     | 93.0 $\pm$ 0.6          | > 0.999  |
| Emetine                    | 50 nM         | 91.2 $\pm$ 2.1          | > 0.999  |

**Supplemental Table 4. Summary of experiments for SW1353 cells treated with the compounds upregulating *KLF4*.** The results of statistical analyses are summarized for the experiments shown in Figure 1B. \* and \*\*, significant upregulation with P<0.05 and P<0.01, respectively. DR, significant downregulation. NS, non-significant changes. Dunnett's test versus DMSO (n=4 from four independent experiments). Results of one-way mixed-effects ANOVA test are shown in Supplemental Table 17.

| Compound                   | <i>COL2A1</i> | <i>COL11A2</i> | <i>SOX9</i> | <i>ACAN</i> |
|----------------------------|---------------|----------------|-------------|-------------|
| Tosedostat                 | NS            | NS             | NS          | NS          |
| Entinostat                 | *             | **             | **          | *           |
| Peruvoside                 | NS            | NS             | NS          | NS          |
| 9-methoxycamptothecin      | NS            | *              | **          | DR          |
| Belotecan hydrochloride    | NS            | **             | **          | NS          |
| Chidamide                  | **            | **             | **          | *           |
| PF-05175157                | NS            | NS             | *           | NS          |
| Mocetinostat               | **            | **             | **          | *           |
| SN-38                      | NS            | **             | **          | NS          |
| Stilbazium iodide          | NS            | **             | NS          | DR          |
| Octenidine dihydrochloride | NS            | NS             | NS          | DR          |
| Exatecan mesylate          | *             | **             | **          | NS          |

**Supplemental Table 13. Summary of enriched pathways common between URGs of RNA-seq and URPs of TMT-MS.**

| Enriched pathways common between URGs of RNA-seq and URPs of TMT-MS | URGs of RNA-seq for KLF4-overexpressed samples |
|---------------------------------------------------------------------|------------------------------------------------|
| Arrhythmogenic right ventricular cardiomyopathy                     | Enriched                                       |
| PPAR signaling pathway                                              | Not enriched                                   |
| Dilated cardiomyopathy                                              | Enriched                                       |
| Hypertrophic cardiomyopathy                                         | Enriched                                       |
| Leukocyte transendothelial migration                                | Enriched                                       |
| Arginine and proline metabolism                                     | Not enriched                                   |
| ECM-receptor interaction                                            | Enriched                                       |
| Proteoglycans in cancer                                             | Enriched                                       |
| Toxoplasmosis                                                       | Not enriched                                   |

**Supplemental Table 14. Extracted data for PPARs and PPARGCs in RNA-seq of mocetinostat- versus DMSO-treated samples.**

| Gene ID         | Gene symbol | Log2(FC)  | <i>P</i> value | FDR      |
|-----------------|-------------|-----------|----------------|----------|
| ENSG00000186951 | PPARA       | 5.77E-01  | 2.75E-02       | 6.86E-02 |
| ENSG00000112033 | PPARD       | 2.29E-01  | 1.24E-01       | 2.32E-01 |
| ENSG00000132170 | PPARG       | -4.70E-01 | 1.41E-02       | 3.92E-02 |
| ENSG00000109819 | PPARGC1A    | 5.08E+00  | 4.53E-24       | 1.38E-22 |
| ENSG00000155846 | PPARGC1B    | 3.57E-01  | 6.42E-02       | 1.38E-01 |



**Supplemental Table 15. List of TaqMan probes.**

| Species | Gene            | Probe         |
|---------|-----------------|---------------|
| Human   | <i>ACAN</i>     | Hs00153936_m1 |
| Human   | <i>ADAMTS5</i>  | Hs01095518_m1 |
| Human   | <i>COL1A1</i>   | Hs00164004_m1 |
| Human   | <i>COL2A1</i>   | Hs00264051_m1 |
| Human   | <i>COL10A1</i>  | Hs00166657_m1 |
| Human   | <i>COL11A2</i>  | Hs00365416_m1 |
| Human   | <i>FOXO1</i>    | Hs00231106_m1 |
| Human   | <i>GAPDH</i>    | Hs02786624_g1 |
| Human   | <i>KLF2</i>     | Hs00360439_g1 |
| Human   | <i>KLF4</i>     | Hs00358836_m1 |
| Human   | <i>IL6</i>      | Hs00174131_m1 |
| Human   | <i>MMP3</i>     | Hs00968305_m1 |
| Human   | <i>MMP13</i>    | Hs00233992_m1 |
| Human   | <i>PPARGC1A</i> | Hs00173304_m1 |
| Human   | <i>PRG4</i>     | Hs00981633_m1 |
| Human   | <i>PTGS2</i>    | Hs00153133_m1 |
| Human   | <i>RUNX2</i>    | Hs00231692_m1 |
| Human   | <i>SCX</i>      | Hs03054634_g1 |
| Human   | <i>SOX9</i>     | Hs00165814_m1 |
| Human   | <i>TNXB</i>     | Hs00372889_g1 |

**Supplemental Table 16. Antibodies used for IHC.**

| Antibody                   | Clone      | Manufacturer (Cat. No.)           | Dilution |
|----------------------------|------------|-----------------------------------|----------|
| Goat anti-KLF4             | Polyclonal | R&D Systems (#AF3158)             | 1:300    |
| Rabbit anti-PGC-1 $\alpha$ | Polyclonal | Novus Biologicals (NBP1-04676)    | 1:200    |
| Rabbit anti-FOXO1          | C29H4      | Cell Signaling Technology (#2880) | 1:50     |
| Rabbit anti-ADAMTS5        | Polyclonal | Abcam (#ab41037)                  | 1:100    |
| Rabbit anti-IL6            | Polyclonal | Abcam (#ab6672)                   | 1:600    |
| Rabbit anti-MMP13          | Polyclonal | Abcam (#ab39012)                  | 1:300    |
